# Supplementary material for: Polymorphism of G4 associates: from stacks to wires via interlocks
Source: PubMed Central journal article supplement — Nucleic Acids Res. 2018 Aug 11;46(17):8978–92. doi: 10.1093/nar/gky729 (PMC6158749; doi:10.1093/nar/gky729), 2018-08-11
Supplement: gky729_supplemental_files.pdf [file gky729_supplemental_files.pdf]

SUPPLEMENTARY DATA

Polymorphism of G4 associates: from stacks to wires via interlocks

A. Varizhuk, A. Protopopova, V. Tsvetkov, N. Barinov, V. Podgorsky, M. Tankevich, M. Vlasenok, V. Severov, I. Smirnov, E. Dubrovin, D. Klinov, G. Pozmogova\*

\*To whom correspondence should be addressed. Tel: +7 (499) 246-4843; Fax: +7 (499) 246-4570; Email: pozmge@gmail.com (Galina E. Pozmogova).

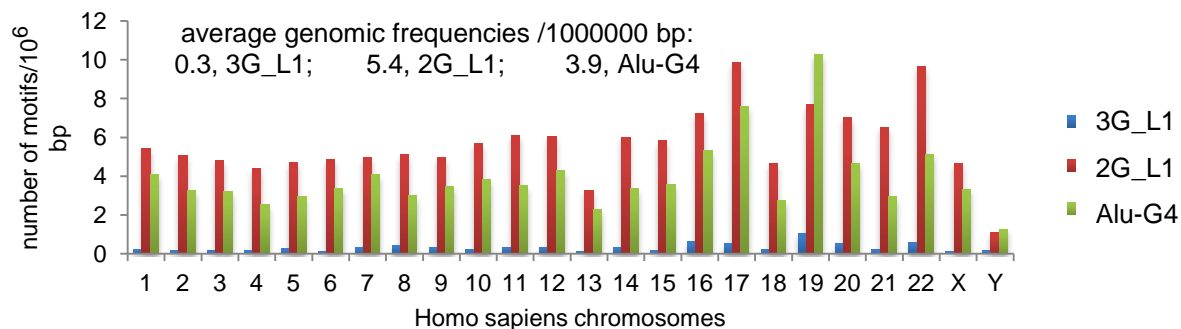

Fig. S1. Genomic distribution of the parallel G4 motifs used in this study.

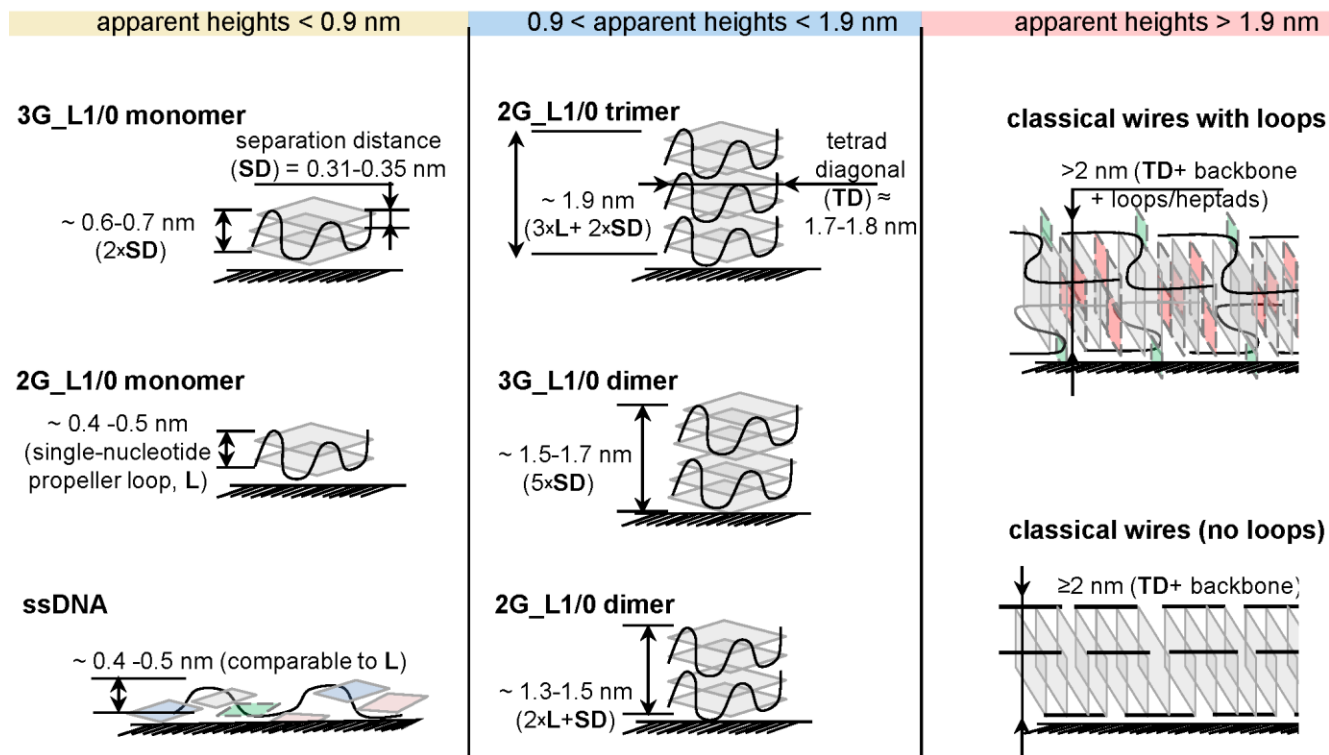

Fig. S2. Expected heights of the G4s adsorbed on a solid support. SD – separation distance; L – single-nucleotide propeller loop, TD – tetrad diagonal.

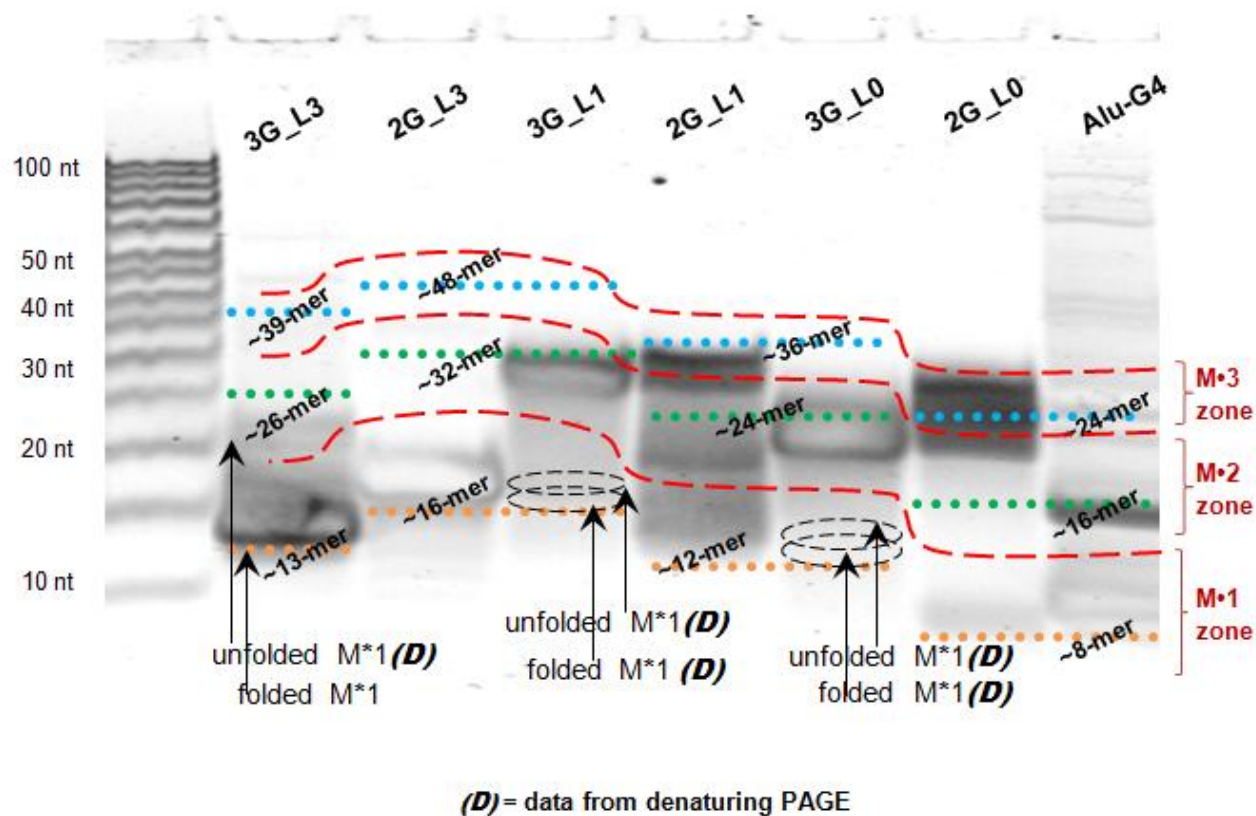

**Fig. S3.** Detailed analysis of G4 migration rates in native PAAG (from Fig. 5A – 10 mM KCl, rapid annealing). Yellow dotted lines mark positions of the folded monomers. Green and blue dotted lines mark the presumed positions of dimers (M\*2) and trimers (M\*3), respectively (determined based on the actual M\*1 positions).

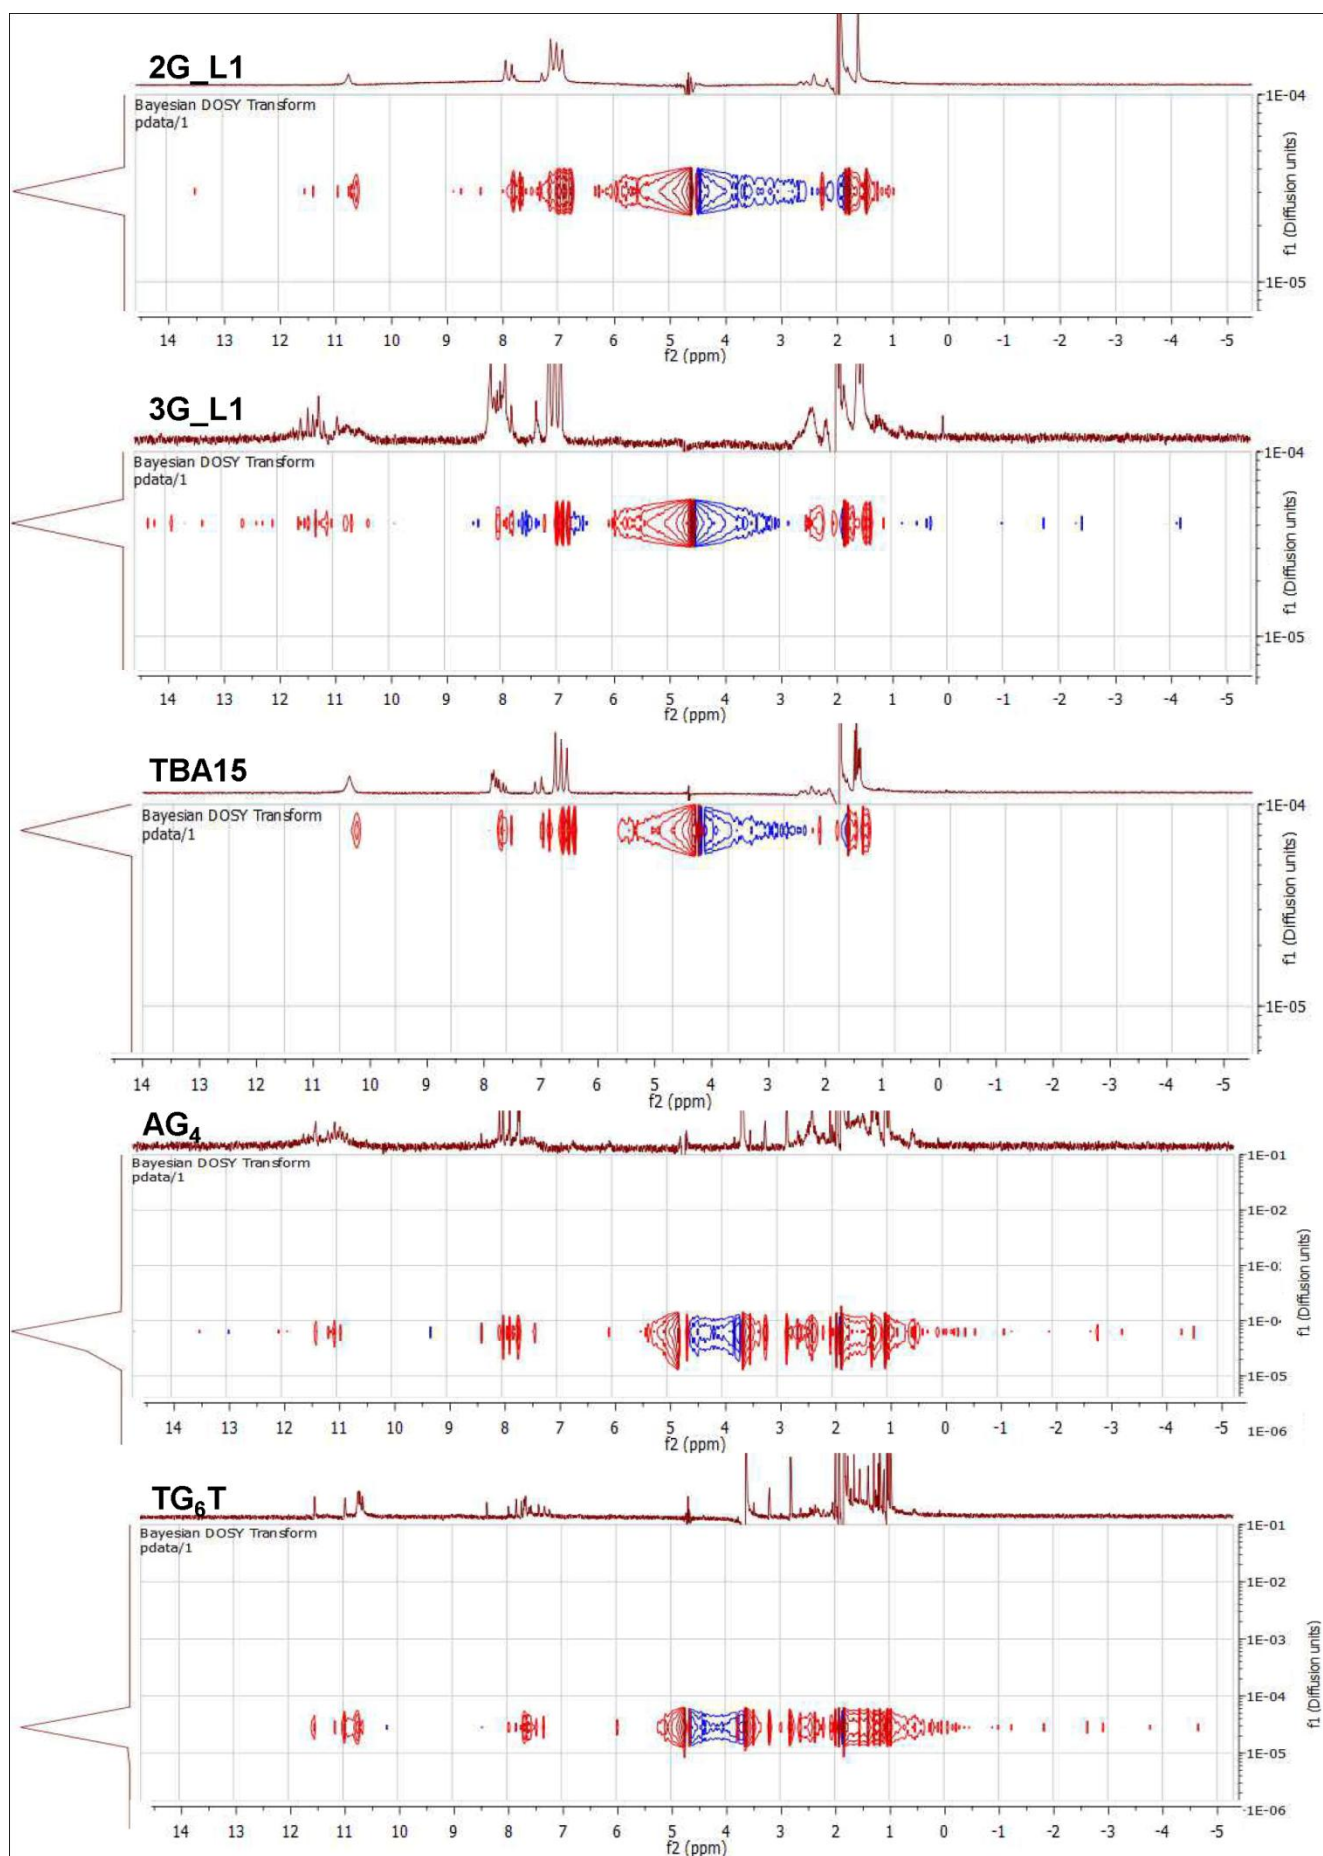

**Fig. S4.** DOSY-NMR spectra of the G4s. Conditions: 0.1 mM ON, 20 mM Tris-HCl (pH 7.6), 10 mM KCl. 3G\_L0, 3G\_L1, 2G\_L1 and TBA15 samples were annealed rapidly prior to the experiments. AG<sub>4</sub> and TG<sub>6</sub>T samples were annealed slowly prior to the experiments.

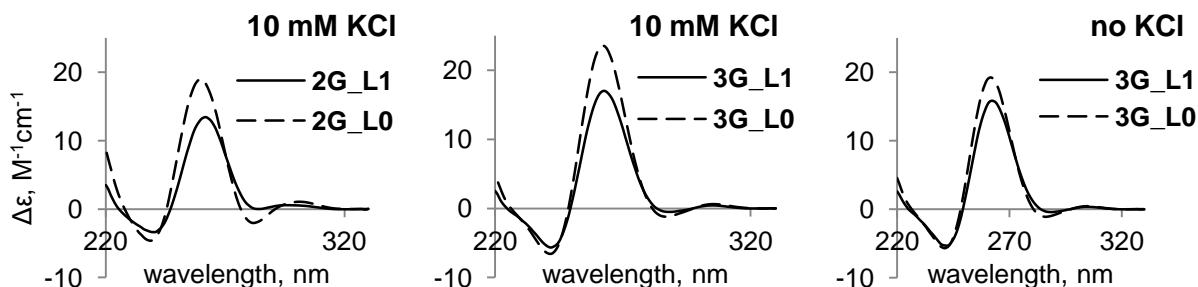

**Fig. S5.** CD spectra of G4s with single-T or modified loops obtained at NMR and PAGE ON concentration (100  $\mu$ M). The spectra were recorded at 5°C. Ellipticity is given per mole of nt. The samples were annealed under rapidly in the presence of 20 mM Tris-HCl (pH 7.6) with 10 mM KCl or without KCl prior to the experiments.

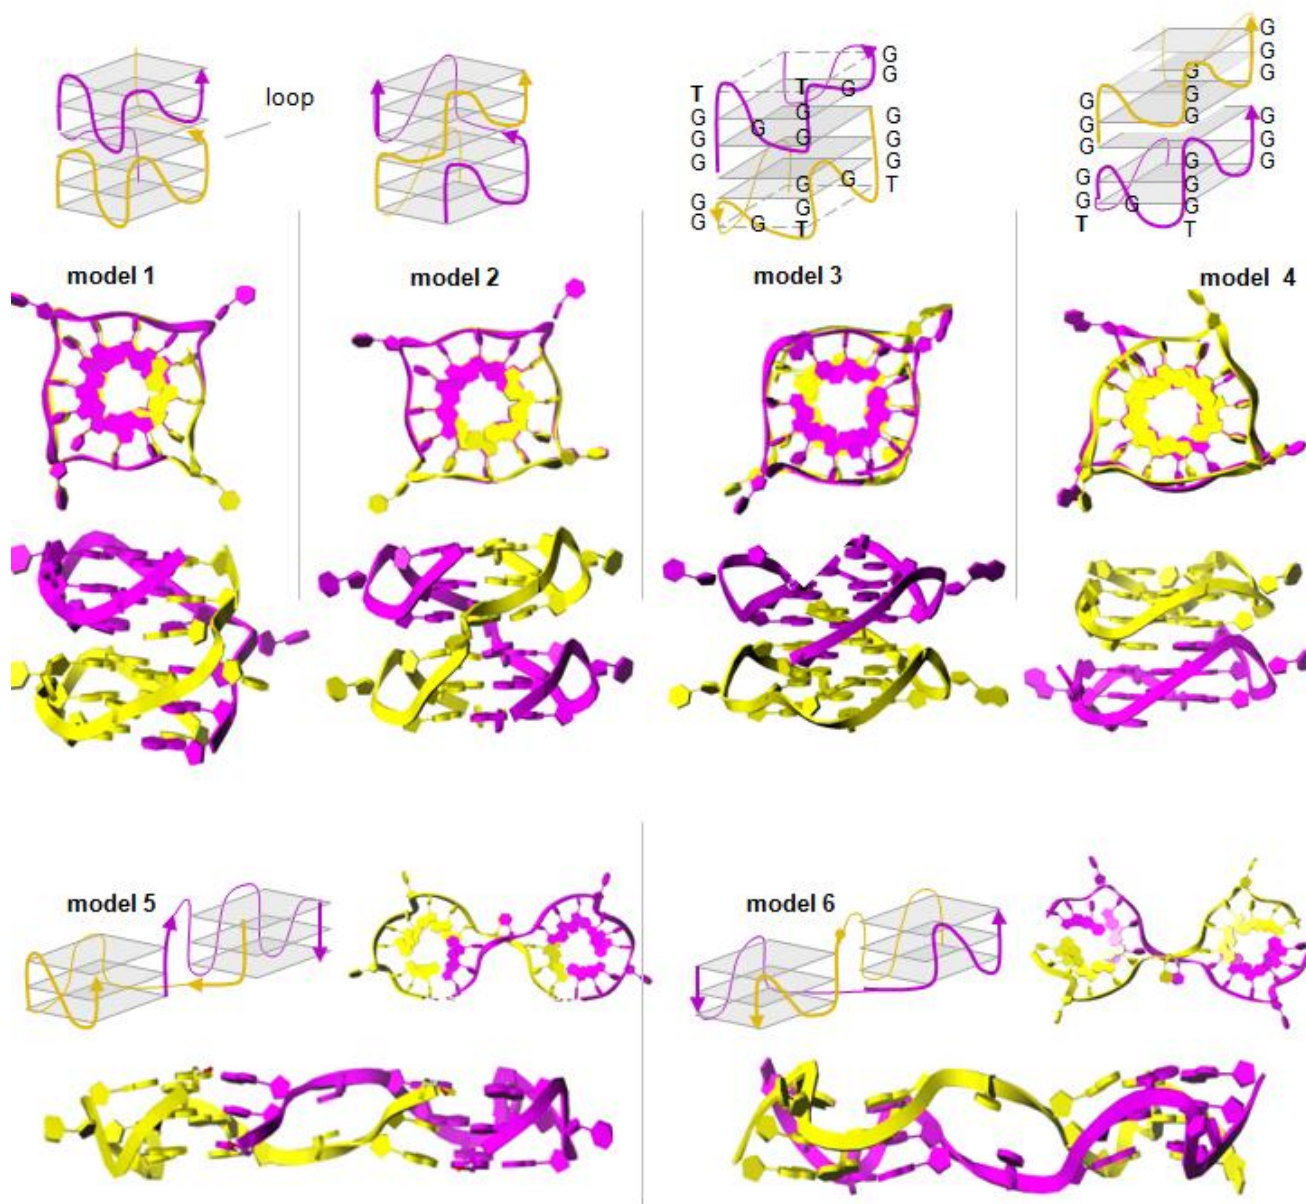

**Fig. S6.** Molecular modeling of interlocked 3G\_L1 dimers (schemes, top views and front views). Model 1 – vertical interlocking via single G-track; model 2 - vertical interlocking via two G-tracks; model 3 - vertical interlocking via single nucleotides (head-to-head); model 4 - vertical interlocking via single nucleotides (head-to-tail); model 5 – side-by-side interlocking via single G-track; model 6 – side-by-side interlocking via two G-tracks.
